# Supplementary material for: Isolation and mass spectrometry based hydroxyproline mapping of type II collagen derived from Capra hircus ear cartilage
Source: PubMed Central journal article supplement (PMC6488623; doi:10.1038/s42003-019-0394-6), 2019-04-29
Supplement: 42003_2019_394_MOESM1_ESM.pdf [file 42003_2019_394_MOESM1_ESM.pdf]

## Supplementary

### Isolation and mass spectrometry based hydroxyproline mapping of type II collagen derived from *Capra hircus* ear cartilage

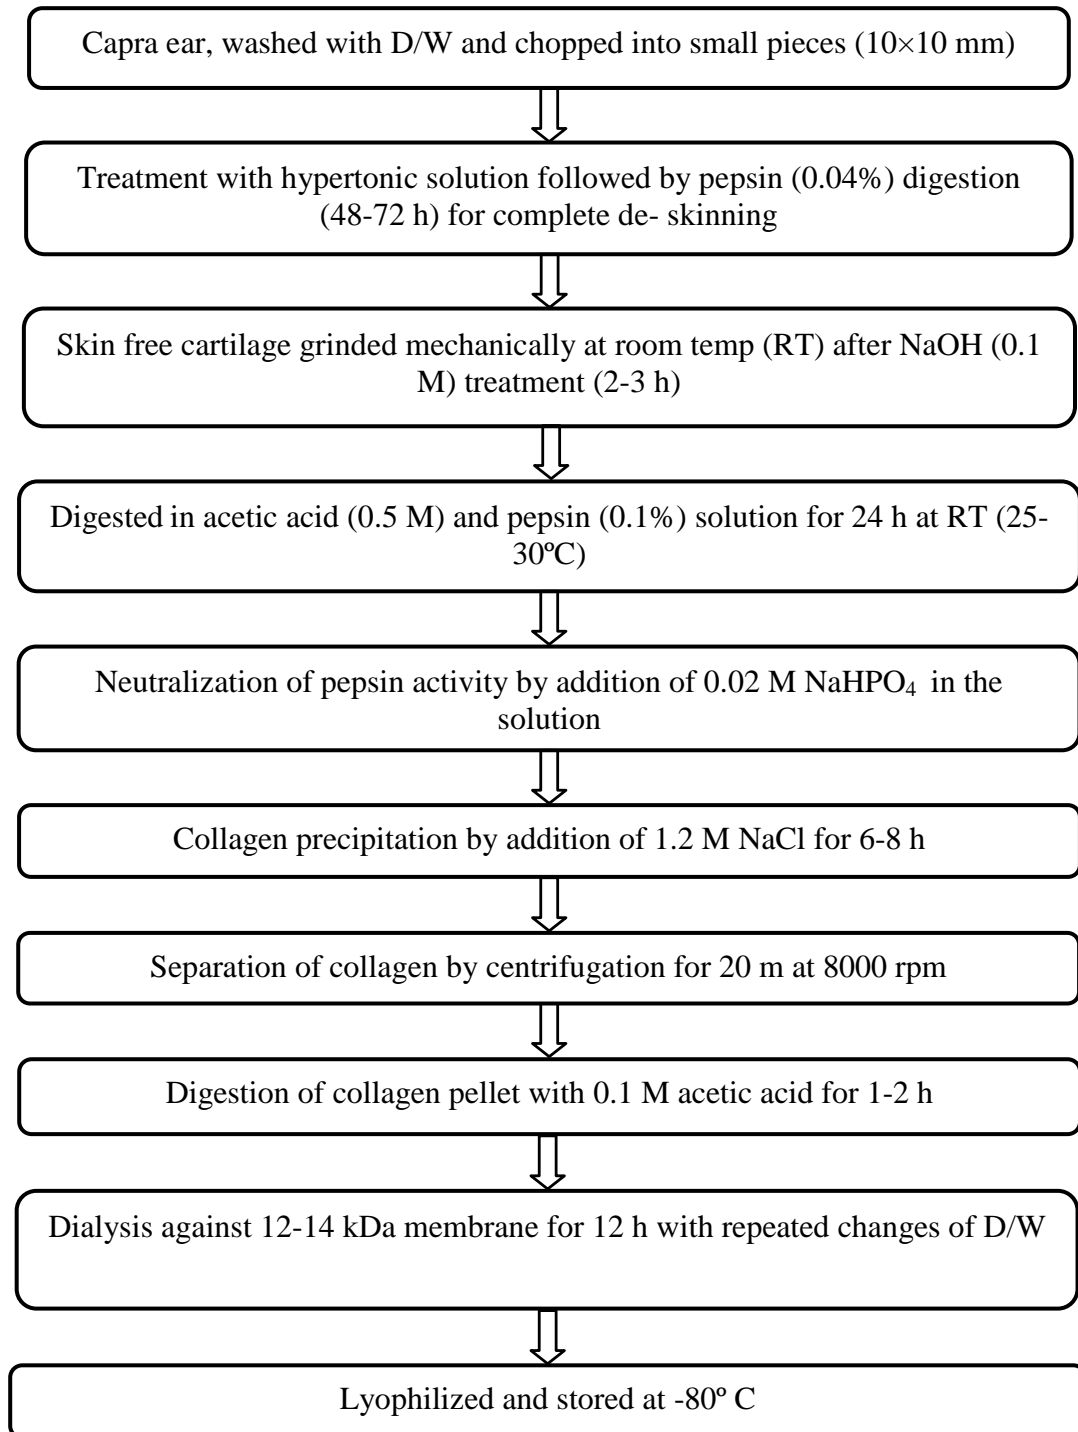

**Supplementary Figure 1.** Schematic representation of collagen II isolation from *Capra* ear.

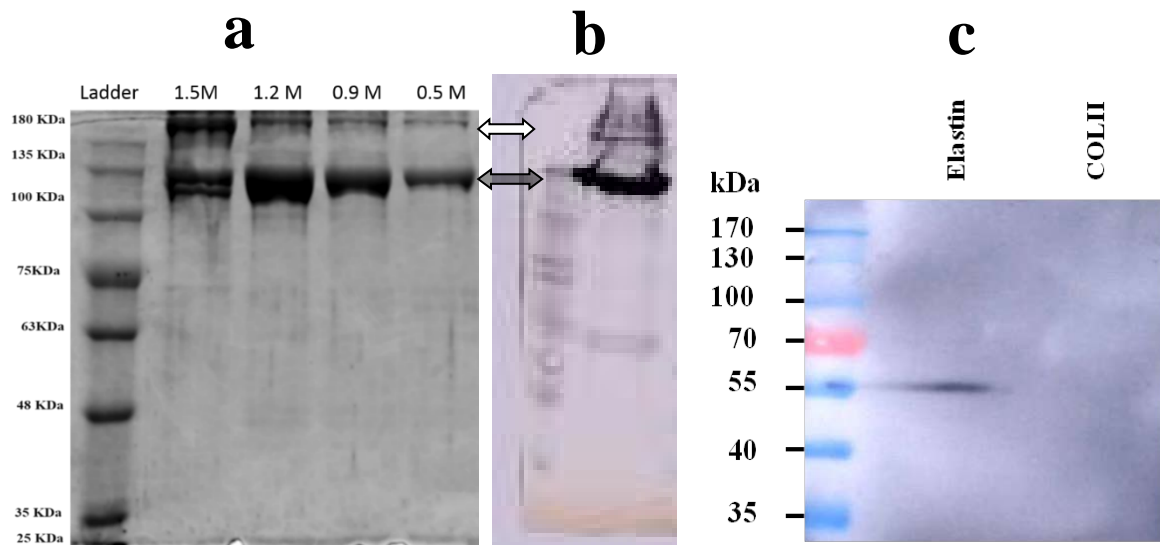

**Supplementary Figure 2.** Identification of purified COLII by SDS-PAGE and western blot analysis. (a) SDS-PAGE showing the isolated COLII with two prominent bands where filled arrow indicating  $\alpha$  chain and open arrow indicating  $\beta$  chain, (b)  $\alpha$  chain was identified using anti-COLII antibody using western blot analysis and (c) showing prominent band of bovine elastin (Sigma, USA) as a control and absence of band in *Capra* ear derived COLII indicating isolated protein was devoid of elastin.

```

Capra_COLIIA1 MIRLGAPQTLVLLTLLVAAVLRCHGQDVQKAGSCVQDQQRYNKDKVWKPEPCRCVCDTG 60
Bos_COLIIA1 MIRLGAPQTLVLLTLLVAAVLRCHGQDVQKAGSCVQDQQRYNKDKVWKPEPCRCVCDTG 60
Homo_COLIIA1 MIRLGAPQTLVLLTLLVAAVLRCHGQDVQKAGSCVQDQQRYNKDKVWKPEPCRCVCDTG 60
*****

Capra_COLIIA1 TVLCDDIICEDMKDCLSPETPFGECCPICADLPTASGQPGPKGQKGEKGEKIDIVGPKG 120
Bos_COLIIA1 TVLCDDIICEDMKDCLSPETPFGECCPICADLPTASGQPGPKGQKGEKGEKIDIVGPKG 120
Homo_COLIIA1 TVLCDDIICEDVKDCLSPETPFGECCPICADLPTASGQPGPKGQKGEKGEKIDIVGPKG 120
*****

Capra_COLIIA1 PPGPQGPAGEQGPGRDRGDKGEKAGPGRGRDGEPTGPNPGRPDPGPPGPPGLGGNFA 180
Bos_COLIIA1 PPGPQGPAGEQGPGRDRGDKGEKAGPGRGRDGEPTGPNPGRPDPGPPGPPGLGGNFA 180
Homo_COLIIA1 PPGPQGPAGEQGPGRDRGDKGEKAGPGRGRDGEPTGPNPGRPDPGPPGPPGLGGNFA 180
*****

Capra_COLIIA1 AQMAGGFDEKAGGAQMGMVQGMGPMGPRGPPGAPAGPQGFQGNPGEPEPGVSGPMG 240
Bos_COLIIA1 AQMAGGFDEKAGGAQMGMVQGMGPMGPRGPPGAPAGPQGFQGNPGEPEPGVSGPMG 240
Homo_COLIIA1 AQMAGGFDEKAGGAQLGVMQGMGPMGPRGPPGAPAGPQGFQGNPGEPEPGVSGPMG 240
*****

Capra_COLIIA1 PRGPPGPPGKPGDDGEAGKPGKSGERPPGQARGFPPTGVLGPKGHRGYPGLDGAAG 300
Bos_COLIIA1 PRGPPGPPGKPGDDGEAGKPGKSGERPPGQARGFPPTGVLGPKGHRGYPGLDGAAG 300
Homo_COLIIA1 PRGPPGPPGKPGDDGEAGKPGKSGERPPGQARGFPPTGVLGPKGHRGYPGLDGAAG 300
*****

Capra_COLIIA1 EAGAPGVKGESGSPGENSGPMPGRPLGERGRTGPAGAAGARGNDQPPGAPGPPVPG 360
Bos_COLIIA1 EAGAPGVKGESGSPGENSGPMPGRPLGERGRTGPAGAAGARGNDQPPGAPGPPVPG 360
Homo_COLIIA1 EAGAPGVKGESGSPGENSGPMPGRPLGERGRTGPAGAAGARGNDQPPGAPGPPVPG 360
*****

Capra_COLIIA1 PAGGPGFPGAPGAKGEAGPTGARGPEGAQGRPEPTGSPGAPAGNPGTDGIPGAKG 420
Bos_COLIIA1 PAGGPGFPGAPGAKGEAGPTGARGPEGAQGRPEPTGSPGAPAGNPGTDGIPGAKG 420
Homo_COLIIA1 PAGGPGFPGAPGAKGEAGPTGARGPEGAQGRPEPTGSPGAPAGNPGTDGIPGAKG 420
*****

Capra_COLIIA1 APGPAGEEGKRGARGEPGGAGPAGPPGERGAPGNRFPQDGLAGPKGAPGERGSPGLAG 540
Bos_COLIIA1 APGPAGEEGKRGARGEPGGAGPAGPPGERGAPGNRFPQDGLAGPKGAPGERGSPGLAG 540
Homo_COLIIA1 APGPAGEEGKRGARGEPGGVGPJGPPGERGAPGNRFPQDGLAGPKGAPGERGSPGLAG 540
*****

Capra_COLIIA1 PKGANGDPGRPEPGLPGARGLTGRPGDAGPQKVGPSGAPGEDGRPPGPPGARGQPG 600
Bos_COLIIA1 PKGANGDPGRPEPGLPGARGLTGRPGDAGPQKVGPSGAPGEDGRPPGPPGARGQPG 600
Homo_COLIIA1 PKGANGDPGRPEPGLPGARGLTGRPGDAGPQKVGPSGAPGEDGRPPGPPGARGQPG 600
*****

Capra_COLIIA1 VMGFPKPGKANGEPGKAGEKGLPGAPLRLPGKDGETGAAGPPGAPGAPGERGEPGAPG 660
Bos_COLIIA1 VMGFPKPGKANGEPGKAGEKGLPGAPLRLPGKDGETGAAGPPGAPGAPGERGEPGAPG 660
Homo_COLIIA1 VMGFPKPGKANGEPGKAGEKGLPGAPLRLPGKDGETGAAGPPGAPGAPGERGEPGAPG 660
*****

Capra_COLIIA1 PSGFQGLPGPPGPPGEGGKPGDQVPEAGAPLVGPRGERGFPGERGSPGQGLQARG 720
Bos_COLIIA1 PSGFQGLPGPPGPPGEGGKPGDQVPEAGAPLVGPRGERGFPGERGSPGQGLQARG 720
Homo_COLIIA1 PSGFQGLPGPPGPPGEGGKPGDQVPEAGAPLVGPRGERGFPGERGSPGQGLQARG 720
*****

Capra_COLIIA1 LPGTPTDGPKGAAGPAGPPGAGQPPGLQGMPPERGAAGIAGPKGDRGDVGEKGEAGAP 780
Bos_COLIIA1 LPGTPTDGPKGAAGPAGPPGAGQPPGLQGMPPERGAAGIAGPKGDRGDVGEKGEAGAP 780
Homo_COLIIA1 LPGTPTDGPKGAAGPAGPPGAGQPPGLQGMPPERGAAGIAGPKGDRGDVGEKGEAGAP 780
*****

Capra_COLIIA1 KDGGRGLTGPVIGPPGAGANGEKGEVPPGAGTAGARGAPGERGETGPPGAPGAPGPPG 840
Bos_COLIIA1 KDGGRGLTGPVIGPPGAGANGEKGEVPPGAGTAGARGAPGERGETGPPGAPGAPGPPG 840
Homo_COLIIA1 KDGGRGLTGPVIGPPGAGANGEKGEVPPGAGTAGARGAPGERGETGPPGAPGAPGPPG 840
*****

Capra_COLIIA1 ADGQPGAKGEQGEAGQKGDAGAPGQPPGAPGPPGPTGVTGPKGARGAQQPPGATGFP 900
Bos_COLIIA1 ADGQPGAKGEQGEAGQKGDAGAPGQPPGAPGPPGPTGVTGPKGARGAQQPPGATGFP 900
Homo_COLIIA1 ADGQPGAKGEQGEAGQKGDAGAPGQPPGAPGPPGPTGVTGPKGARGAQQPPGATGFP 900
*****

Capra_COLIIA1 AAGRVPGPSNGNPPGPPGPPGSGKDGPKGARGDSGPPGRAGDPLQGPAGPPGKGEPE 960
Bos_COLIIA1 AAGRVPGPSNGNPPGPPGPPGSGKDGPKGARGDSGPPGRAGDPLQGPAGPPGKGEPE 960
Homo_COLIIA1 AAGRVPGPSNGNPPGPPGPPGSGKDGPKGARGDSGPPGRAGDPLQGPAGPPGKGEPE 960
*****

Capra_COLIIA1 DDGSPGDGPPGQGLAGQRGIVGLPGQRGERGFPGLPGSPGEPGKQAGPAGSADRGGPPG 1020
Bos_COLIIA1 DDGSPGDGPPGQGLAGQRGIVGLPGQRGERGFPGLPGSPGEPGKQAGPAGSADRGGPPG 1020
Homo_COLIIA1 DDGSPGAEPPGPPGQGLAGQRGIVGLPGQRGERGFPGLPGSPGEPGKQAGPAGSADRGGPPG 1020
*****

Capra_COLIIA1 PVGPPGLTGPAGEPREGSPGADGPPGRDGAAGVKGDRGETGAVGAPGAPGPPGSPGAP 1080
Bos_COLIIA1 PVGPPGLTGPAGEPREGSPGADGPPGRDGAAGVKGDRGETGAVGAPGAPGPPGSPGAP 1080
Homo_COLIIA1 PVGPPGLTGPAGEPREGSPGADGPPGRDGAAGVKGDRGETGAVGAPGAPGPPGSPGAP 1080
*****

Capra_COLIIA1 PVGKQDRGEAGAQQMPGAPGAGARGMPGQPRGDKGETEAGERLKGHRGFTGLQG 1140
Bos_COLIIA1 PVGKQDRGEAGAQQMPGAPGAGARGMPGQPRGDKGETEAGERLKGHRGFTGLQG 1140
Homo_COLIIA1 PVGKQDRGEAGAQQMPGSPGAPGARGIQGPPRDKGEAGEPGERLKGHRGFTGLQG 1140
*****

Capra_COLIIA1 LPGPPGSGDQAGSAPGSPGRGPPGPPGVPKDGANGIPGIPGPPGRGRSGETGPAG 1200
Bos_COLIIA1 LPGPPGSGDQAGSAPGSPGRGPPGPPGVPKDGANGIPGIPGPPGRGRSGETGPAG 1200
Homo_COLIIA1 LPGPPGSGDQAGSAPGSPGRGPPGPPGVPKDGANGIPGIPGPPGRGRSGETGPAG 1200
*****

Capra_COLIIA1 PPGNPPGPPGPPGPPGIDMSAFAGLQREKGPDPQLQYMRADAAGNLRQHDAEVDATLK 1260
Bos_COLIIA1 PPGNPPGPPGPPGPPGIDMSAFAGLQREKGPDPQLQYMRADAAGNLRQHDAEVDATLK 1260
Homo_COLIIA1 PPGNPPGPPGPPGPPGIDMSAFAGLQREKGPDPQLQYMRADAAGNLRQHDAEVDATLK 1260
*****

Capra_COLIIA1 SLNNQIESLRSPESRKNPARTCRDLKLCHEWKSVDYIDPNQGCTLDAMKVFNMETG 1320
Bos_COLIIA1 SLNNQIESLRSPESRKNPARTCRDLKLCHEWKSVDYIDPNQGCTLDAMKVFNMETG 1320
Homo_COLIIA1 SLNNQIESLRSPESRKNPARTCRDLKLCHEWKSVDYIDPNQGCTLDAMKVFNMETG 1320
*****

Capra_COLIIA1 ETCVYVNPASVPKKNWSSKSKDKKHIWFGETINGGFHF SYGDDNLPANTANVQMTFLRL 1380
Bos_COLIIA1 ETCVYVNPASVPKKNWSSKSKDKKHIWFGETINGGFHF SYGDDNLPANTANVQMTFLRL 1380
Homo_COLIIA1 ETCVYVNPANVPKKNWSSKSKDKKHIWFGETINGGFHF SYGDDNLPANTANVQMTFLRL 1380
*****

Capra_COLIIA1 LSTEGSQNTYHCKNSIAYLDEAAGNLKAL LIQGSNDVEIRAEGNSRFTYTLKDGCTK 1440
Bos_COLIIA1 LSTEGSQNTYHCKNSIAYLDEAAGNLKAL LIQGSNDVEIRAEGNSRFTYTLKDGCTK 1440
Homo_COLIIA1 LSTEGSQNTYHCKNSIAYLDEAAGNLKAL LIQGSNDVEIRAEGNSRFTYTLKDGCTK 1440
*****

Capra_COLIIA1 HTGKWKGTIEYRSQKTSRLPIIDIAPMDIGGPEQEFVGDIGPVCFL 1487
Bos_COLIIA1 HTGKWKGTIEYRSQKTSRLPIIDIAPMDIGGPEQEFVGDIGPVCFL 1487
Homo_COLIIA1 HTGKWKGTIEYRSQKTSRLPIIDIAPMDIGGPEQEFVGDIGPVCFL 1487
*****

```

Supplementary Figure 3. Amino acid sequence alignment of COLIIA1 from *Capra hircus*, *Bos taurus* and *Homo sapiens* showing 98% identity.

|      |                   |                    |                    |                    |                    |
|------|-------------------|--------------------|--------------------|--------------------|--------------------|
| 1    | MIRLGAPQTL        | VLLTLLVAAV         | LRCHGQDVQK         | AGSCVQDGQR         | YNDKDVWKPE         |
| 51   | PCRICVCDTG        | TVLCDDIICE         | DMKDCLSPET         | PFGECCPICS         | ADLPTASGQP         |
| 101  | GPKGQKGEFG        | DIKDIVGPKG         | PPGPQGPAGE         | QGPRGDRGDK         | <b>GEKGAPGPRG</b>  |
| 151  | RDGEPGTPGN        | PGPPGPPGPP         | GPPGLGGNFA         | AQMAGGFDEK         | <b>AGGAQMGMVMQ</b> |
| 201  | <b>GPMGPMGPRG</b> | PPGPAGAPGP         | QGFQGNPGEP         | GEPGVSGPMG         | PRGPPGPPGK         |
| 251  | PGDDGEAGKP        | GKSGER <b>GPPG</b> | <b>PQGARGFPPT</b>  | <b>PGLPGVKGHR</b>  | GYPGLDGAKG         |
| 301  | EAGAPGVKGE        | SGSPGENGSP         | GPMGPRGLPG         | ERGR <b>TGPAGA</b> | <b>AGARGNDGQP</b>  |
| 351  | GPAGPPGPVG        | PAGGPGFPGA         | PGAKEAGPT          | GARGPEGAQG         | PRGEPGTPGS         |
| 401  | PGPAGAAGNP        | GTDGIPGAKG         | <b>SAGAPGIAGA</b>  | <b>PGFPGPRGPP</b>  | GPQGATGPLG         |
| 451  | PKGQTGEPGI        | AGFKGEQGP          | GEPGPAGPQG         | APGPAGEEGK         | RGARG <b>EPGGA</b> |
| 501  | <b>GPAGPPGERG</b> | <b>APGNRGFPQG</b>  | <b>DLAGPKGAP</b>   | <b>GERGPSGLAG</b>  | <b>PKGANGDPGR</b>  |
| 551  | <b>PGEPLPGAR</b>  | <b>GLTGRPGDAG</b>  | <b>PQKVGPSGA</b>   | <b>PGEDGRGPP</b>   | <b>GPQGARGQPG</b>  |
| 601  | VMGFPGPKGA        | NGEPGKAGEK         | <b>GLPGAPLRG</b>   | <b>LPKDGGETGA</b>  | <b>AGPPGPAGPA</b>  |
| 651  | <b>GERGEQGAPG</b> | PSGFQGLPGP         | PGPPGEGGKP         | GDQGVFGEAG         | APGLVGRGE          |
| 701  | <b>RGFPGERGS</b>  | GSQGLQGARG         | <b>LPGTPGTDGP</b>  | <b>KGAAGPAGPP</b>  | <b>GAQPPGLQG</b>   |
| 751  | <b>MPGERGAAGI</b> | <b>AGPKGDRGDV</b>  | GEKGPEGAPG         | KDGGRGLTGP         | IGPPGPAGAN         |
| 801  | GEKGEVGGPP        | PAGTAGARGA         | PERGET <b>GPP</b>  | <b>GPAGFAGPPG</b>  | <b>ADGQPGAKGE</b>  |
| 851  | QGEAGQKQDA        | GAPGPQGPSG         | APGPQGPQTV         | TGPKGARG <b>AG</b> | <b>GPPGATGFPG</b>  |
| 901  | <b>AAGRVGPPGS</b> | NGNPGPPGPP         | GPSGKDGP           | ARGDSGPPGR         | AGDPGLQGPA         |
| 951  | GPPGEKGEFG        | DDGPSGPDGP         | PGPQGLAGQR         | <b>GIVGLPGQRG</b>  | ERGF <b>PGLPGP</b> |
| 1001 | <b>SGEPGKQGAP</b> | <b>GASGDRGPPG</b>  | <b>PVGPPLTGP</b>   | <b>AGEPREGSP</b>   | GADGPPGRDG         |
| 1051 | <b>AAGVKGDRGE</b> | <b>TGAVGAPGAP</b>  | <b>GPPGSPGAP</b>   | <b>PIGKQGDRGE</b>  | <b>AGAQQPMGPA</b>  |
| 1101 | <b>GPAGARGMPG</b> | <b>PQGPRGDKGE</b>  | TGEAGERGLK         | GHR <b>GFTGLQG</b> | <b>LPGPPGPSGD</b>  |
| 1151 | <b>QGASGPAGPS</b> | <b>GPRGPPGPVG</b>  | PSGKD <b>GANGI</b> | <b>PGPIGPPGPR</b>  | GRSGETGPAG         |
| 1201 | PPGNPGPPGP        | PGPPGPGIDM         | SAFAGLGQRE         | KGPDPLQYMR         | ADEAAGNLRQ         |
| 1251 | HDAEVDATLK        | SLNNQIESLR         | SPEGSRKNPA         | RTCRDLKLCH         | PEWKSGDYWI         |
| 1301 | DPNQGCTLDA        | MKVFCNMETG         | ETCVYPNPAS         | VPKKNWSSK          | SKDKKHIWFG         |
| 1351 | ETINGGFHFS        | YGDDNLAPNT         | ANVQMTFLRL         | LSTEGSQNIT         | YHCKNSIAYL         |
| 1401 | DEAAGNLKKA        | LLIQGSNDVE         | IRAEGNSRFT         | YTVLKDGGCTK        | HTGKWKGTMI         |
| 1451 | EYRSQKTSRL        | PIIDIAPMDI         | GGPEQEFGVD         | IGPVCFL            |                    |

**Supplementary Figure 4.** Highlighted amino acid sequences identified from *Capra COLIA1* by peptide mass finger printing using *Bos taurus COLIA1* as template sequence.



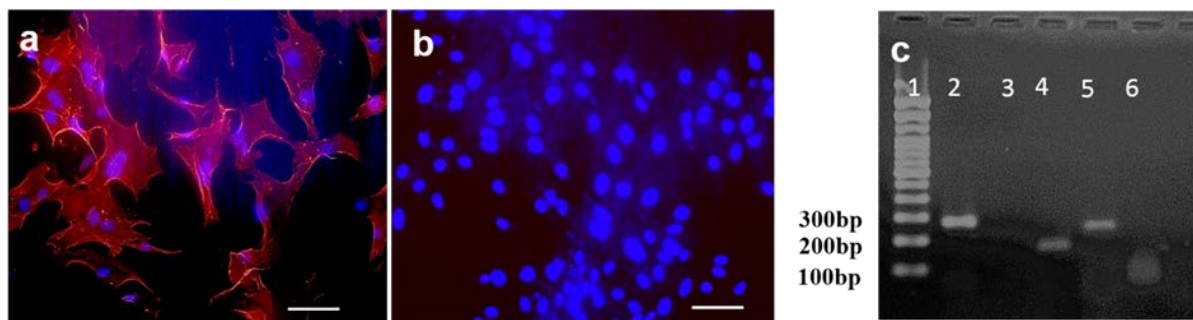

**Supplementary Figure 5.** Identification of isolated capra ADMSCs. Protein expression analysis showed (A) positive expression of CD 44 marker and (B) negative expression of CD 31 marker (pseudo colors, Scale bars: 100  $\mu$ m); (C) RT-PCR study revealed expression of GAPDH (lane 2), CD 73 (lane 4), CD 90 (lane 5) and CD 105 (lane 6) and negative expression of CD 45 marker associated genes (lane 3) in reference to 100 bp ladder (lane 1).

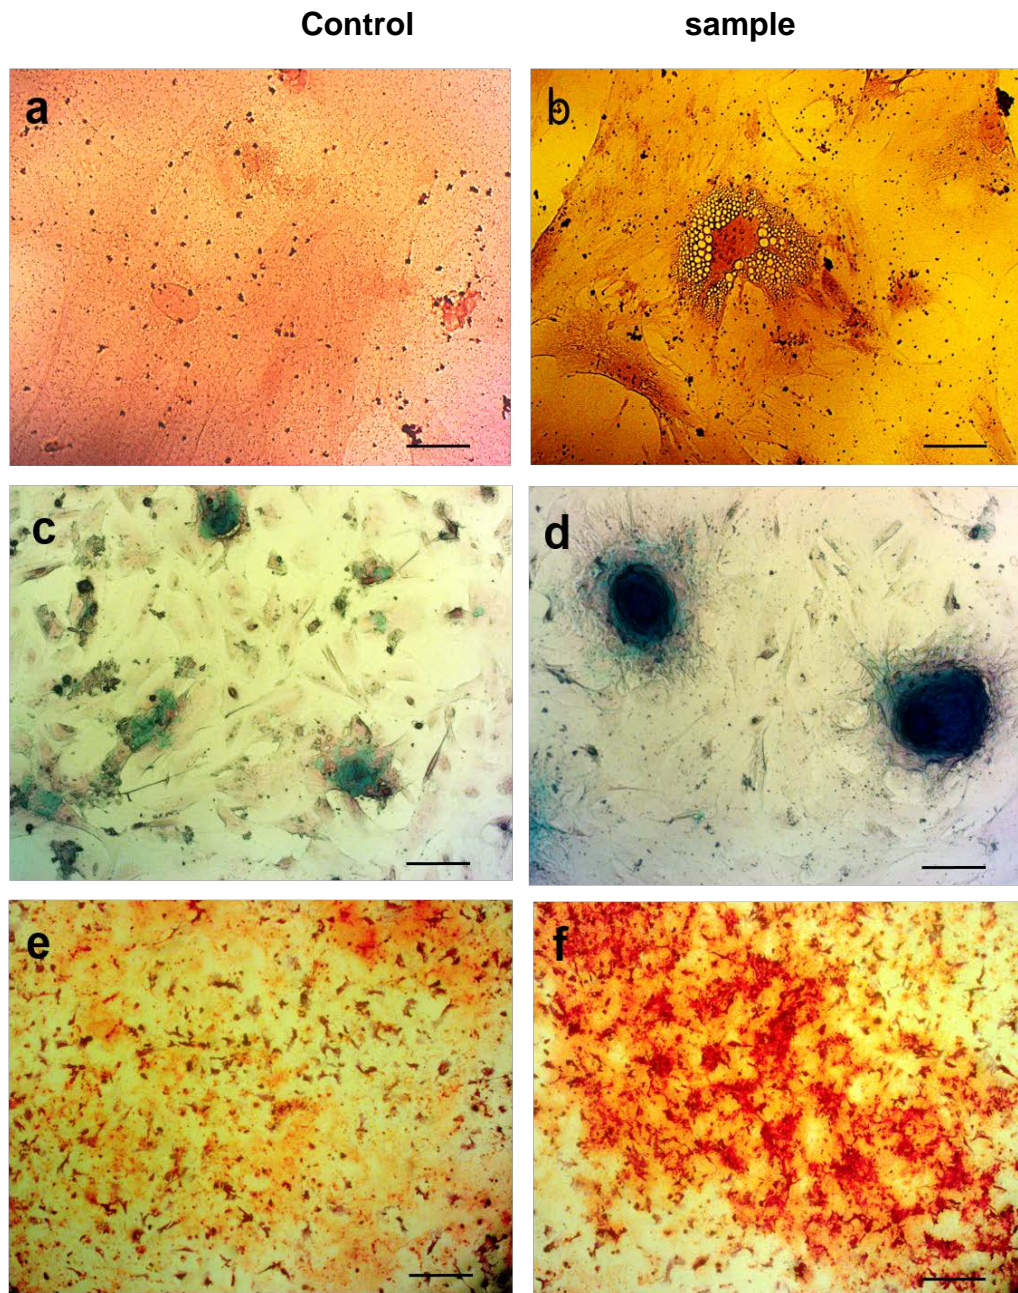

**Supplementary Figure 6.** Assessment of trilineage differentiation potential of ADMSCs to adipogenic, chondrogenic and osteogenic lineage. (A-B) showing significant accumulation of lipid droplets by Oil Red O staining in cytoplasm after cells cultured under adipogenic differentiation media compared to control (Scale bars: 50  $\mu\text{m}$ ); (C-D) depicting cartilage micro-tissue formation as stained by Alcian Blue after cells cultured under chondrogenic differentiation media compared to control (Scale bars: 100  $\mu\text{m}$ ); (E-F) identified significant calcium deposition by Alizarin Red S staining after cells cultured under osteogenic differentiation media as compared to control (Scale bars: 500  $\mu\text{m}$ ).

**Supplementary Table 1: Predictive values of percentage denaturation of COL II secondary structure**

| <b>Temp. (°C)</b> | <b><math>\alpha</math>-helix</b> | <b><math>\beta</math>-strand</b> | <b>% of denature</b> | <b>% of intactness</b> |
|-------------------|----------------------------------|----------------------------------|----------------------|------------------------|
| 25                | 53.23                            | 8.04                             | 0                    | 100                    |
| 30                | 53.26                            | 7.68                             | 0                    | 100                    |
| 35                | 52.49                            | 7.93                             | 1.4                  | 98.60                  |
| 40                | 50.26                            | 8.25                             | 5.58                 | 94.42                  |
| 41                | 44.02                            | 8.74                             | 17.31                | 82.69                  |
| 42                | 37.61                            | 9.71                             | 29.35                | 70.65                  |
| <b>43</b>         | <b>25.98</b>                     | <b>11.68</b>                     | <b>51.2</b>          | <b>48.80</b>           |
| 44                | 19.02                            | 12.20                            | 64.27                | 35.73                  |
| 45                | 17.38                            | 12.07                            | 67.35                | 32.65                  |
| 46                | 17.73                            | 11.99                            | 66.7                 | 33.30                  |
| 47                | 16.16                            | 12.07                            | 69.55                | 30.35                  |
| 48                | 16.12                            | 12.35                            | 69.72                | 30.28                  |
| 49                | 15.69                            | 12.11                            | 70.53                | 29.47                  |
| 50                | 15.33                            | 12.47                            | 77.21                | 28.79                  |

**Supplementary Table 2: Comparative analysis of amino acid residues in Capra ear cartilage derived COLII with Chicken samples as reported by Cao *et al.*, 2008<sup>16</sup>**

| Amino Acid     | COL II (Cao <i>et al.</i> , 2008)(residues/1000 residues) | Capra ear cartilage derived COL II in present study (residues/1000 residues) |
|----------------|-----------------------------------------------------------|------------------------------------------------------------------------------|
| Glycine        | 313                                                       | 302                                                                          |
| Alanine        | 102                                                       | 105                                                                          |
| Glutamic acid  | 94                                                        | 77                                                                           |
| Proline        | 94                                                        | 99                                                                           |
| Hydroxyproline | 118                                                       | 118                                                                          |
| Arginine       | 53                                                        | 55                                                                           |
| Leucine        | 31                                                        | 29                                                                           |
| Histidine      | 4                                                         | 5                                                                            |
| Lysine         | 15                                                        | 19                                                                           |
| Phenylalanine  | 15                                                        | 21                                                                           |
| Isoleucine     | 13                                                        | 14                                                                           |
| Methionine     | 2                                                         | 10                                                                           |
| Valine         | 22                                                        | 25                                                                           |
| Serine         | 25                                                        | 27                                                                           |
| Threonine      | 30                                                        | 28                                                                           |
| Aspartic Acid  | 47                                                        | 41                                                                           |
| Tyrosine       | 5                                                         | 5                                                                            |
| Cysteine       | 17                                                        | 20                                                                           |



**Supplementary Table 3: Comparisons of COLIIA1 MASCOT score with other proteins**

| <b>Protein</b>               | <b>Mass</b> | <b>Score</b> |
|------------------------------|-------------|--------------|
| COLIIA1_Bos taurus           | 134858      | 82           |
| COLIIA1_Bos mutus            | 134842      | 82           |
| COLIIA1_Bos indicus          | 142919      | 73           |
| COLIIA1_Pantholops hodgsonii | 134852      | 76           |
| COLIIA1_Bubalus bubalis      | 134844      | 76           |
| COLIIA1_Homo sapiens         | 142782      | 56           |

**Supplementary Table 4: HPLC solvent system for amino acid analysis**

| <b>A-Buffer (0.01M Na<sub>2</sub>HPO<sub>4</sub>); B- Acetonitrile, Excitation:230, Emission: 460</b> |           |           |           |           |                         |                                  |
|-------------------------------------------------------------------------------------------------------|-----------|-----------|-----------|-----------|-------------------------|----------------------------------|
| <b>Time</b>                                                                                           | <b>A%</b> | <b>B%</b> | <b>C%</b> | <b>D%</b> | <b>Flow rate ml/min</b> | <b>Max. Pressure limit (Bar)</b> |
| 0.00                                                                                                  | 91.0      | 9.0       | 0.0       | 0.0       | 1.000                   | 400.00                           |
| 2.00                                                                                                  | 80.0      | 20.0      | 0.0       | 0.0       | 1.000                   | 400.00                           |
| 35.00                                                                                                 | 68.0      | 32.0      | 0.0       | 0.0       | 1.000                   | 400.00                           |
| 55.00                                                                                                 | 20.0      | 80.0      | 0.0       | 0.0       | 1.000                   | 400.00                           |
| 57.00                                                                                                 | 91.0      | 9.0       | 0.0       | 0.0       | 1.000                   | 400.00                           |

**Supplementary Table 5: Designed Primers for RT-PCR**

| Genes            | Sequence                          | Annealing Temp.(°C) | Product Size (bp) | References                                  |                    |
|------------------|-----------------------------------|---------------------|-------------------|---------------------------------------------|--------------------|
| <i>GAPDH-FP</i>  | <i>GGCGCTGCCAAGGCCGTGGGCAAG</i>   | 73.0                | 273               | KEGG_10086074<br>3                          |                    |
| <i>GAPDH-RP</i>  | <i>GGCAATGCCAGCCCCAGCATCGAAGG</i> |                     |                   |                                             |                    |
| <i>CD90 -FP</i>  | <i>GCACCATGAACCCTACCATC</i>       | 55                  | 241               | Mohamad-Fauzi et al.,<br>2015 <sup>22</sup> |                    |
| <i>CD90 -RP</i>  | <i>TTGGTTCGGGAGCTGTATTC</i>       |                     |                   |                                             |                    |
| <i>CD73-FP</i>   | <i>CTGAGACACCCGGATGAGAT</i>       | 52                  | 160               |                                             |                    |
| <i>CD73-RP</i>   | <i>ACTGGACCAGGTCAAAGGTG</i>       |                     |                   |                                             |                    |
| <i>CD105-FP</i>  | <i>AGATGCCAACATCACACAGC</i>       | 49                  | 129               |                                             |                    |
| <i>CD105-RP</i>  | <i>TCCAGACGAAGGAAGATGCT</i>       |                     |                   |                                             |                    |
| <i>CD45-FP</i>   | <i>GGGAGGAGGGAAAGCAAACC</i>       | 55                  | 146               |                                             |                    |
| <i>CD45-RP</i>   | <i>GCAGCTCTTCCCCATTCCAG</i>       |                     |                   |                                             |                    |
| <i>COL1A1-FP</i> | <i>GGCGCTGCCAAGGCCGTGGGCAAG</i>   | 64                  | 269               |                                             | KEGG_10086074<br>3 |
| <i>COL1A1-RP</i> | <i>GGCAATGCCAGCCCCAGCATCGAAGG</i> |                     |                   |                                             |                    |
